# Supplementary material for: Phytochemical characterization and antimicrobial activity of Nigella sativa seeds
Source: PubMed Central journal article supplement (PMC9352024; doi:10.1371/journal.pone.0272457), 2022-08-04
Supplement: pone.0272457.s001.pdf [file pone.0272457.s001.pdf]

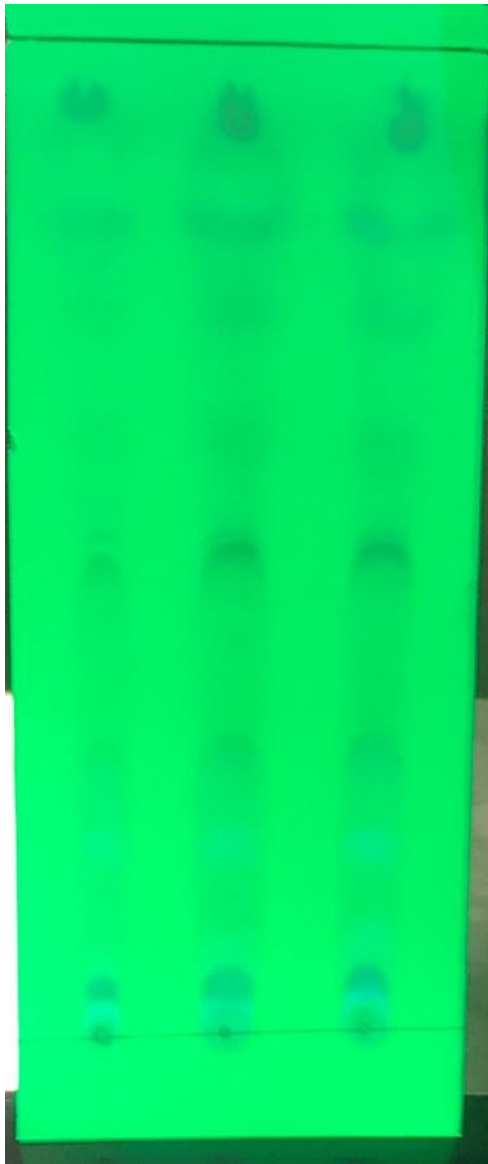

Plate 1 in S1 Fig

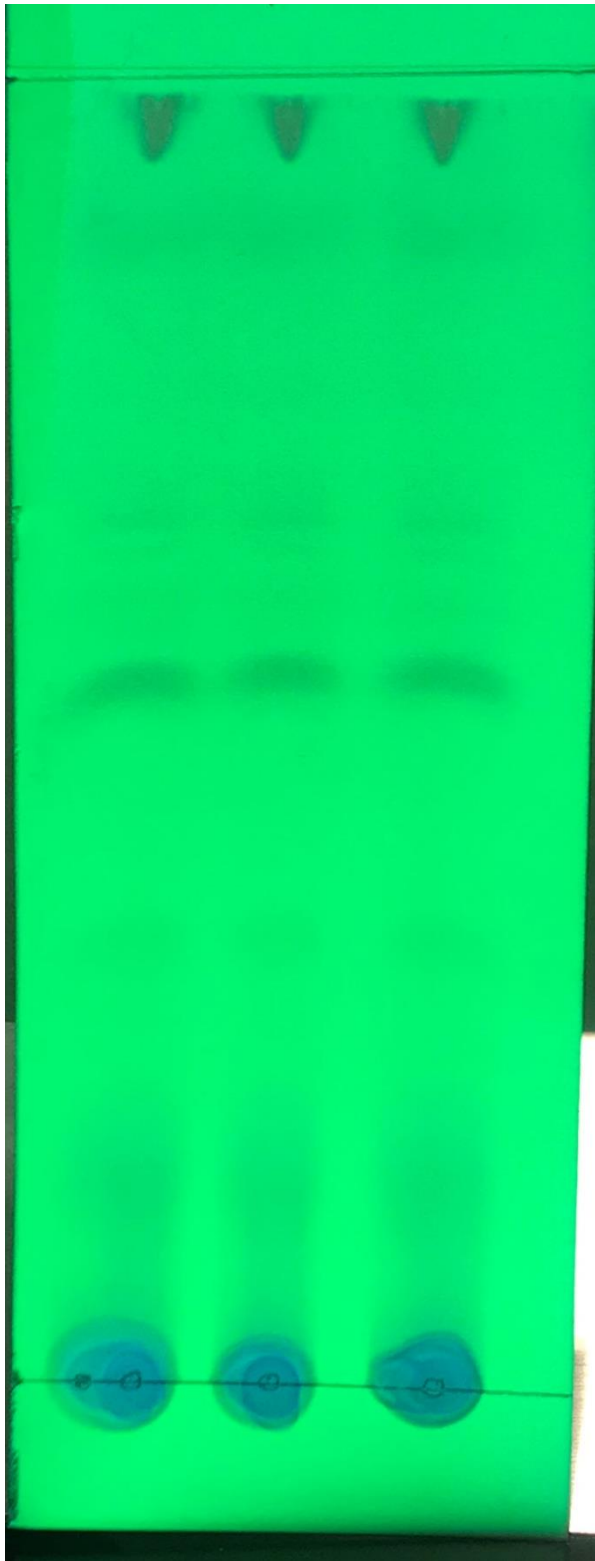

Plate 2 in S1 Fig
